# Supplementary material
Source: PubMed Central journal article supplement (PMC1794399)
Supplement: 7601545s1.pdf [file 7601545s1.pdf]

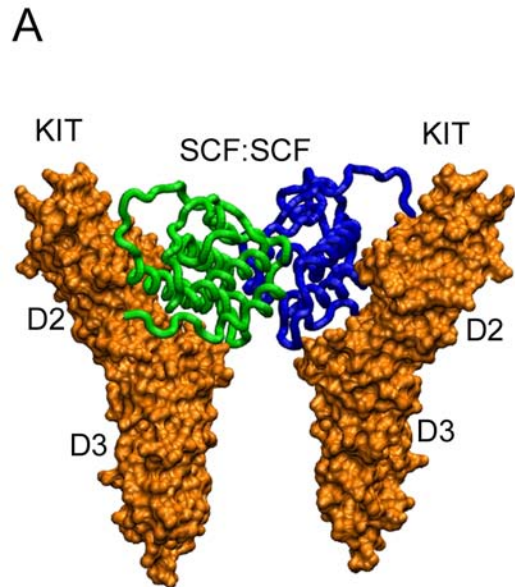

modeled complex between  
SCF and KIT-D2D3 by  
Jiang et al 2000

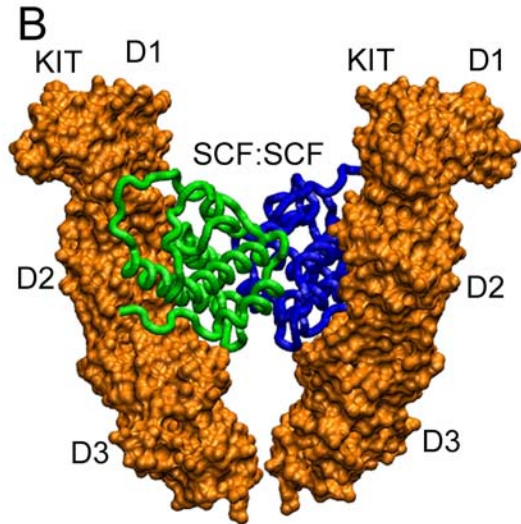

experimental structure  
in this report

Supplementary Figure S1. Comparison between previously modeled SCF/KIT complex (A) (Jiang et al 2000) and the structure solved in this report (B). SCF depicted as tubes and and KIT as surface. The crystal structure differs substantially from modled SCF/KIT complex, mostly because the templates used in modeling, e.g., the VEGF/FLT1 complex and VCAM, have significant differences from SCF/KIT.

A

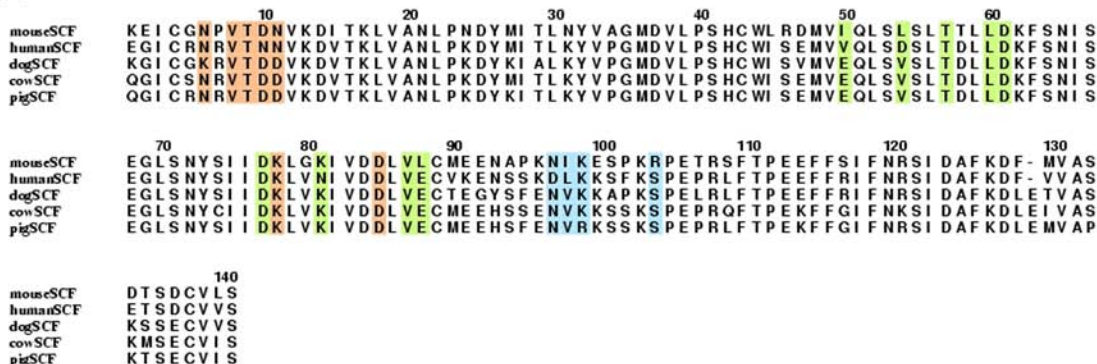

B

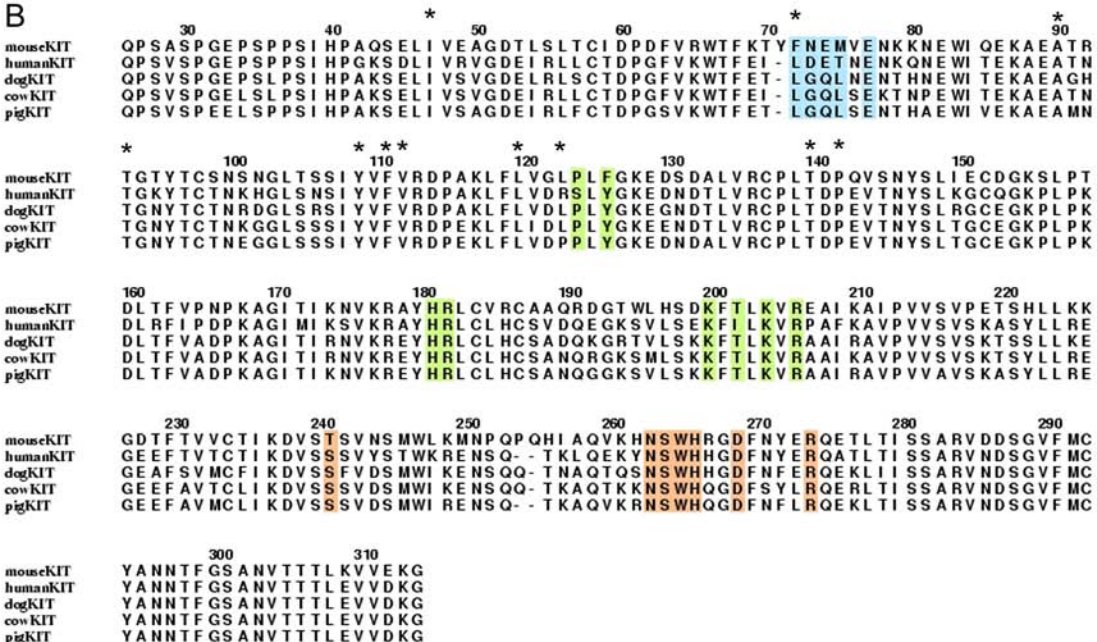

Supplementary Figure S2. Sequence alignment of SCF (A) and KIT (B) across species. Residues involved in ligand/receptor interactions are shaded in blue, green and orange for site 1, site 2 and site 3 respectively. KIT residues involved in D1-D2 hydrophobic interactions are marked with "\*".
